# Supplementary material for: CD147 functions as the signaling receptor for extracellular divalent copper in hepatocellular carcinoma cells
Source: PubMed Central journal article supplement (PMC5584238; doi:10.18632/oncotarget.17712), 2017-05-09
Supplement: oncotarget-08-51151-s001.pdf [file oncotarget-08-51151-s001.pdf]

## CD147 functions as the signaling receptor for extracellular divalent copper in hepatocellular carcinoma cells

### SUPPLEMENTARY MATERIALS

Supplementary Table 1: Primers used for RT-PCR

| Genes         | Forward                   | Reverse                |
|---------------|---------------------------|------------------------|
| <i>mmp-1</i>  | GAAGAATGATGGGAGGCAAGT     | GAGGACAAACTGAGCCACATC  |
| <i>Mmp-2</i>  | GGCAGTGAATACCTGAACAC      | GTCTGGGGCAGTCCAAAGAACT |
| <i>Mmp-3</i>  | TTTTACCCTTTTGATGGACCTG    | GTCCCTGTTGTATCCTTTGTCC |
| <i>Mmp-9</i>  | TTCCCCTTCACTTCCTGGGTA     | CGCCACGAGGAACAAACTGTAT |
| <i>Mmp-14</i> | CTTTTCCATCCCCTGACATAACC   | CTGACTGAGCAACGAAGACCCT |
| <i>Gapdh</i>  | TGATGACATCAAGAAGGTGGTGAAG | TCCTTGAGGCCATGTGGGCCAT |

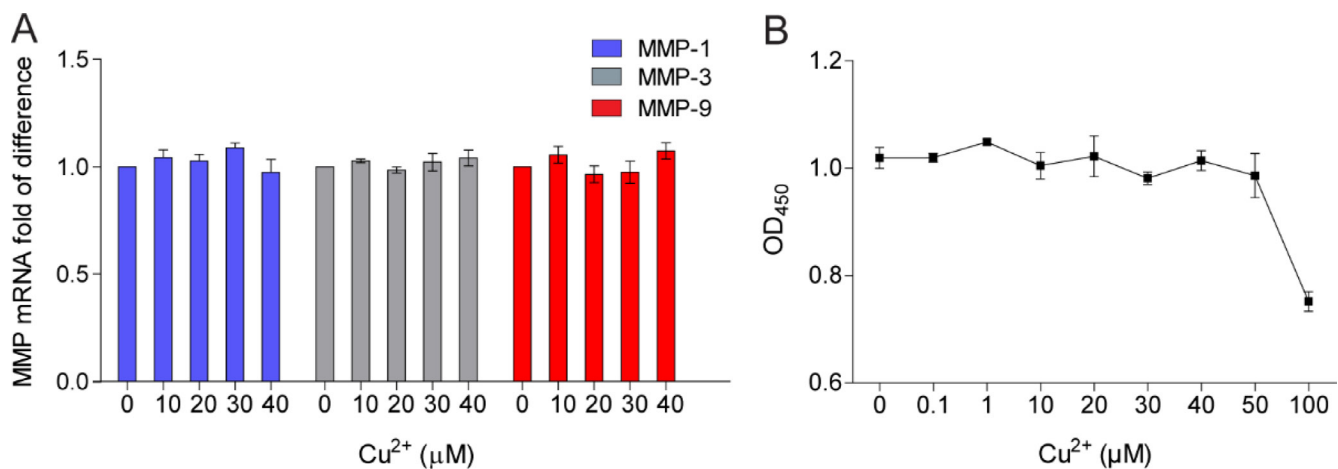

**Supplementary Figure 1: Copper has no effect on the expression of MMP-1, MMP-3 and MMP-9 in SMMC-7721 cells.** (A) qRT-PCR analysis of MMP-1, MMP-3 and MMP-9 in SMMC-7721 cells treated with different concentrations of Cu<sup>2+</sup>. (B) Effect of copper on the viability of SMMC-7721 cells as assessed by WST-1 assay. Up to 50 μM, copper does not significantly affect the cell viability. All data are presented as mean ± SEM. of three independent experiments.

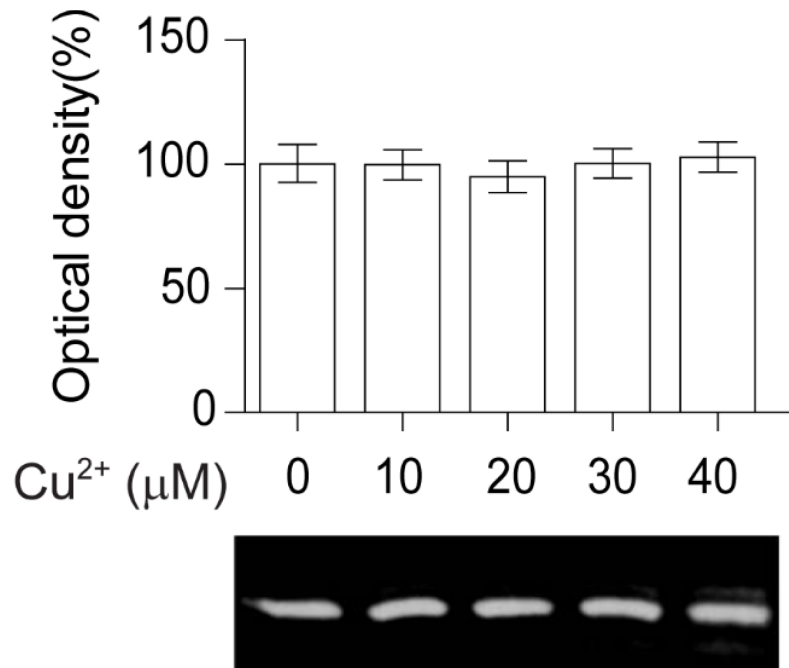

**Supplementary Figure 2: MMP-2 expression of fibroblasts treated with Cu<sup>2+</sup>.** Data are presented as mean ± SEM (*n* = 3). One representative gelatin zymography is shown.

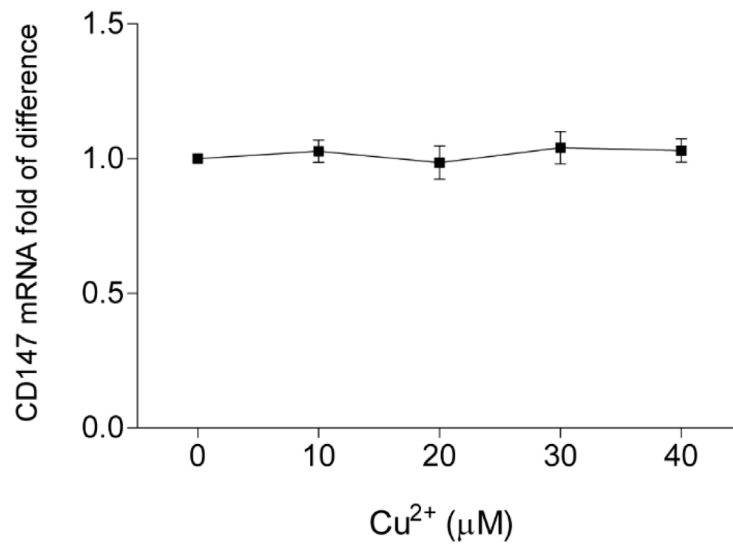

**Supplementary Figure 3: Copper does not affect the expression of CD147.** qRT-PCR analysis of CD147 expression in SMMC-7721 cells treated with different concentrations of Cu<sup>2+</sup>. Data are presented as mean ± SEM of three independent experiments.

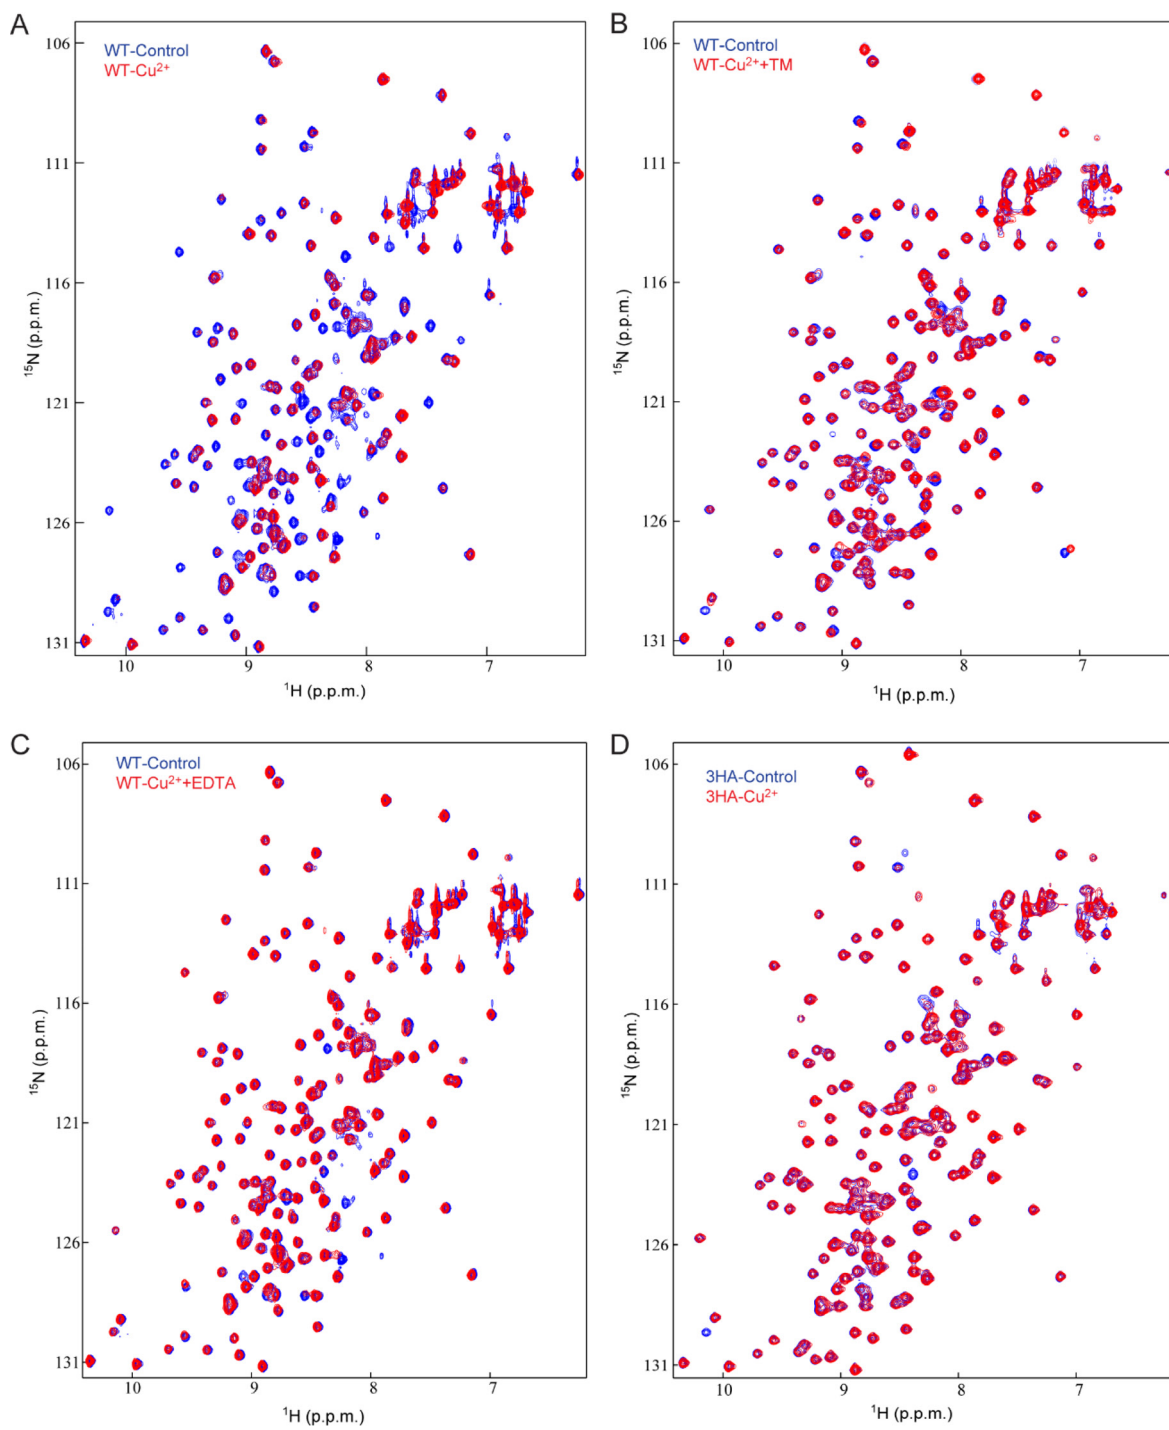

**Supplementary Figure 4: NMR titration experiments of WT CD147 or the 3HA mutant.** (A) Overlay of 2D  $^1\text{H}$ - $^{15}\text{N}$  HSQC spectra of WT-CD147<sup>ECT</sup> with (red) or without (blue) 2-fold excess of  $\text{Cu}^{2+}$ . (B, C) NH signal intensity reduction caused by  $\text{Cu}^{2+}$  can be rescued by copper chelator TM (B) or EDTA (C). (D) Overlay of 2D  $^1\text{H}$ - $^{15}\text{N}$  HSQC spectra of the 3HA mutant with (red) or without (blue) 2-fold excess of  $\text{Cu}^{2+}$ .

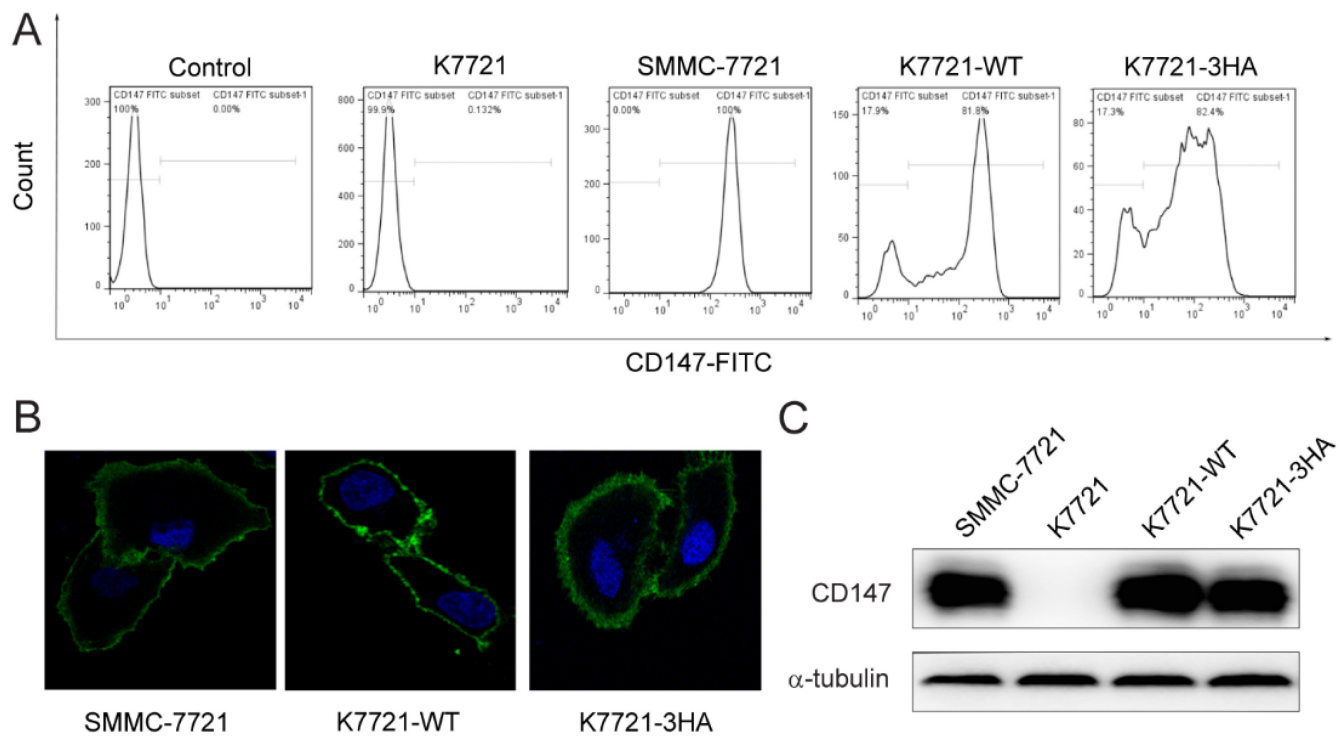

**Supplementary Figure 5: Expression of CD147 in SMMC-7721, K7721-WT and K7721-3HA cells.** (A) CD147 expressed in SMMC-7721, K7721-WT and K7721-3HA cells, but not K7721 cells. (B) CD147 expressed uniformly on the plasma membrane of SMMC-7721, K7721-WT and K7721-3HA cells as imaged by immunofluorescence. (C) Immunoblot analysis of CD147 in SMMC-7721, K7721, K7721-WT and K7721-3HA cells.

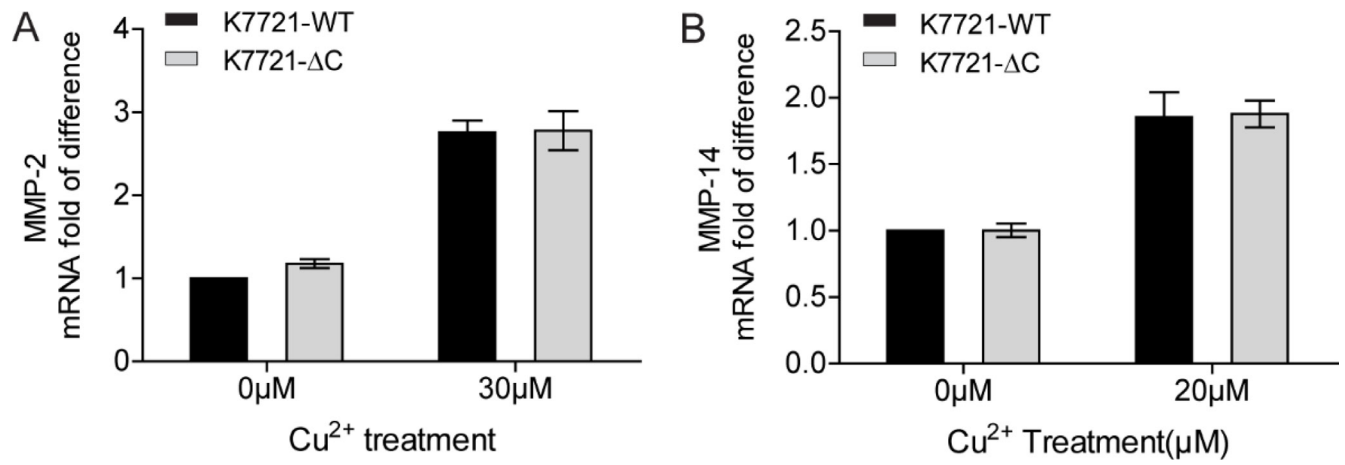

**Supplementary Figure 6: The intracellular domain of CD147 is not required for MMP up-regulation by extracellular Cu<sup>2+</sup>.** (A, B) qRT-PCR analysis of MMP-2 (A) and MMP-14 (B) in K7721-WT and K7721-ΔC cells with or without Cu<sup>2+</sup> treatment (*n* = 3, mean ± SEM).

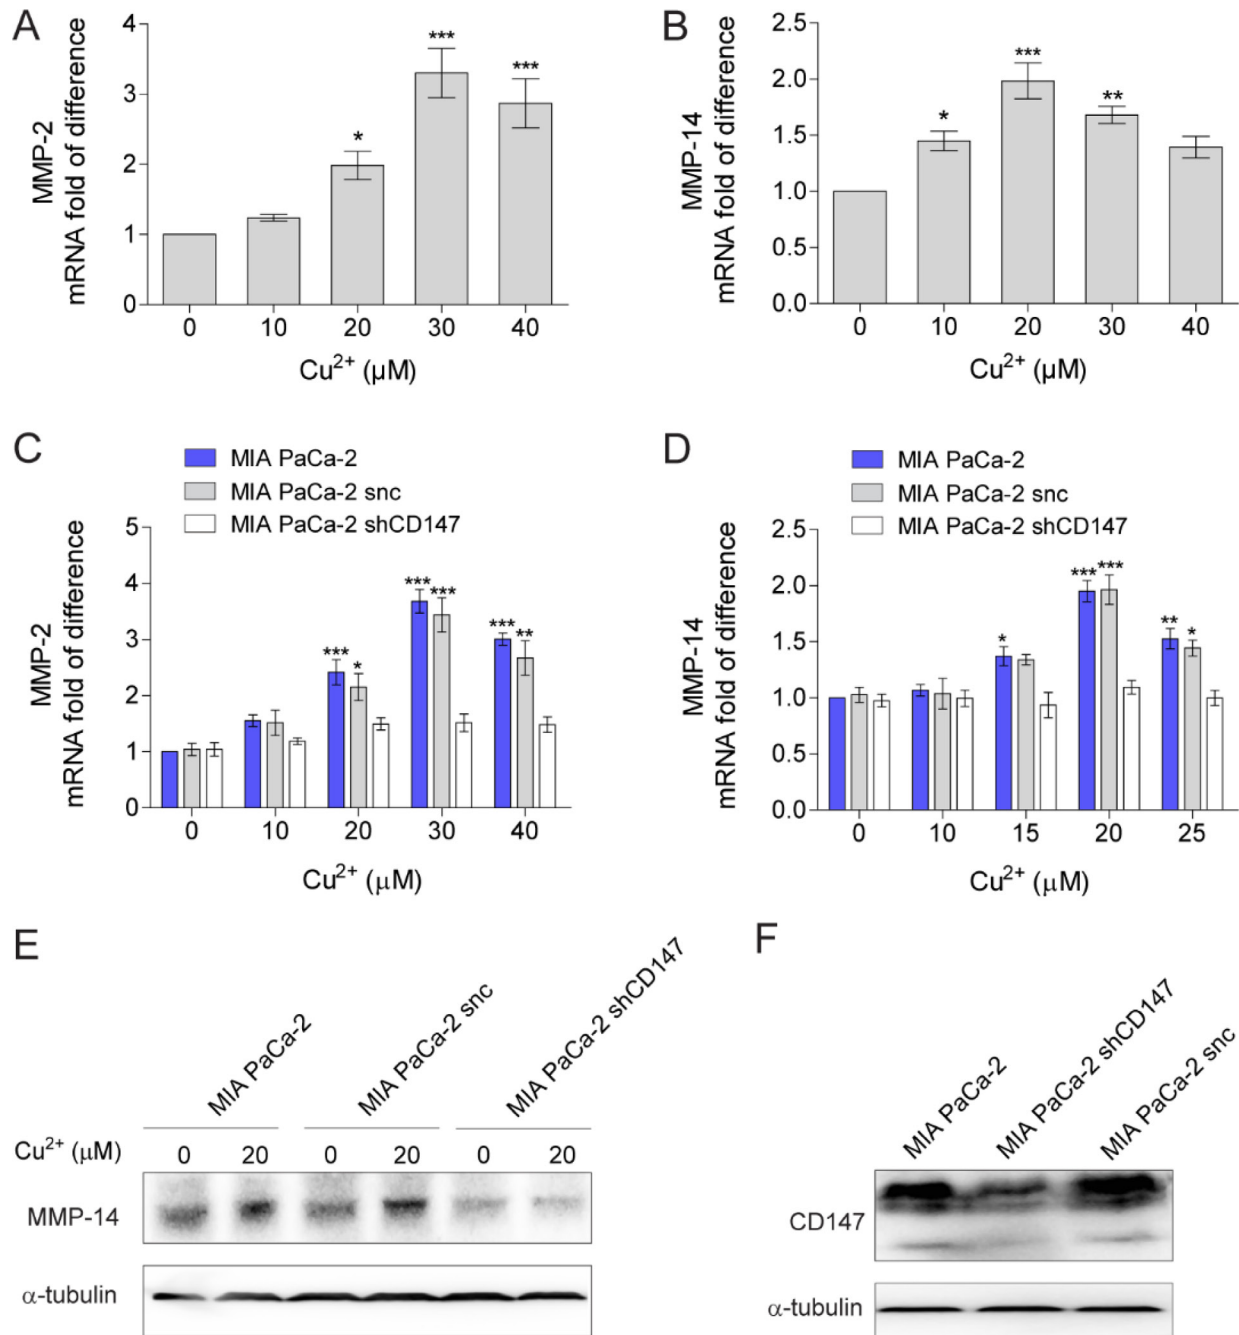

**Supplementary Figure 7: Copper up-regulates the expression of MMP-2 and MMP-14 in HUH-7 and MIA PaCa-2 cells.** (A, B) qRT-PCR analysis of MMP-2 (A) and MMP-14 (B) in HUH-7 cells treated with different concentrations of Cu<sup>2+</sup> ( $n = 3$ , mean  $\pm$  SEM, one way ANOVA). (C, D) qRT-PCR analysis of MMP-2 (C) and MMP-14 (D) in MIA PaCa-2 cells treated with different concentrations of Cu<sup>2+</sup> ( $n=3$ , mean  $\pm$  SEM, one way ANOVA). Cells transfected with *cd147*-specific shRNA (MIA PaCa-2 shCD147) or control shRNA (MIA PaCa-2 snc) were also analyzed. (E). Immunoblot analysis of MMP-14 in MIA PaCa-2, MIA PaCa-2-NC or MIA PaCa-2-shCD147 cells with or without Cu<sup>2+</sup> treatment. (F) The expression of CD147 is knocked down in MIA PaCa-2 shCD147 cells. \* $P < 0.05$ , \*\* $P < 0.01$  and \*\*\* $P < 0.001$ . Gel images in panel E and F are representative of at least two technical replicates.
